# Supplementary material
Source: PubMed Central journal article supplement (PMC4210083)
Supplement: embr0015-0557-sd3.pdf [file embr0015-0557-sd3.pdf]

# Supplementary Figure 3

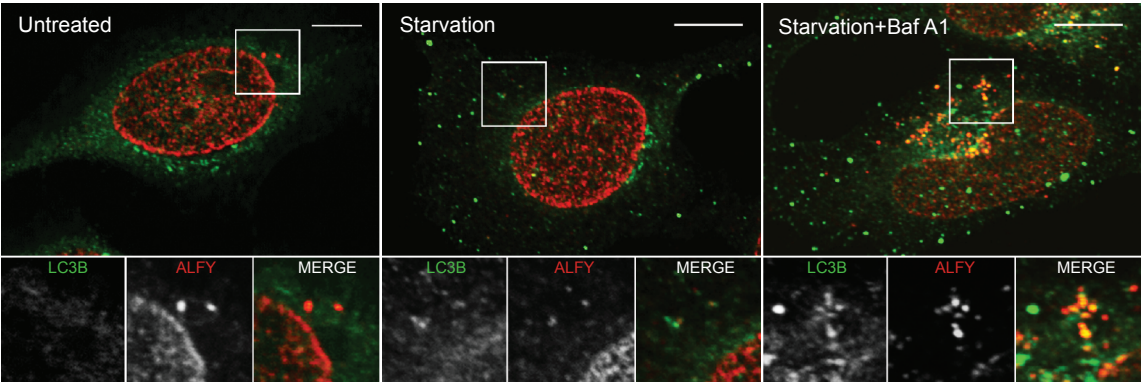

Supplementary Figure S3 HeLa cells were cultured in complete medium (CM) or starvation medium (EBSS) in the absence or presence of BafA1 for 2h. Cells were stained with anti-LC3B and anti-ALFY antibodies before imaging by confocal microscopy. Scale bar 10  $\mu$ m.
