# Supplementary material
Source: PubMed Central journal article supplement (PMC4210083)

Figure 1A

ALFY (total)  
Top left panel

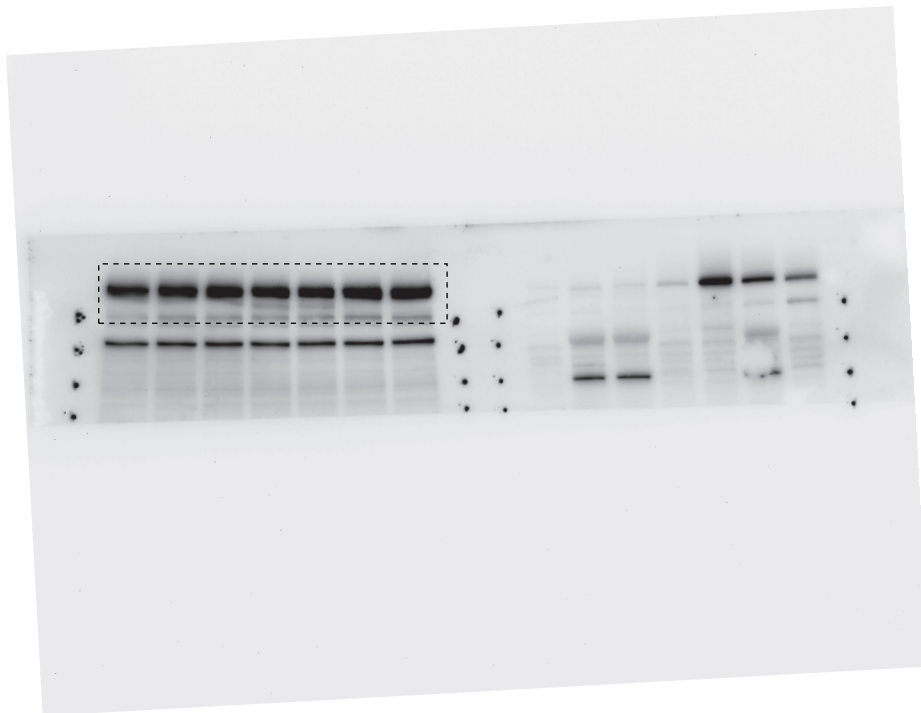

Figure 1A

ALFY (precipitates)  
Top right panel

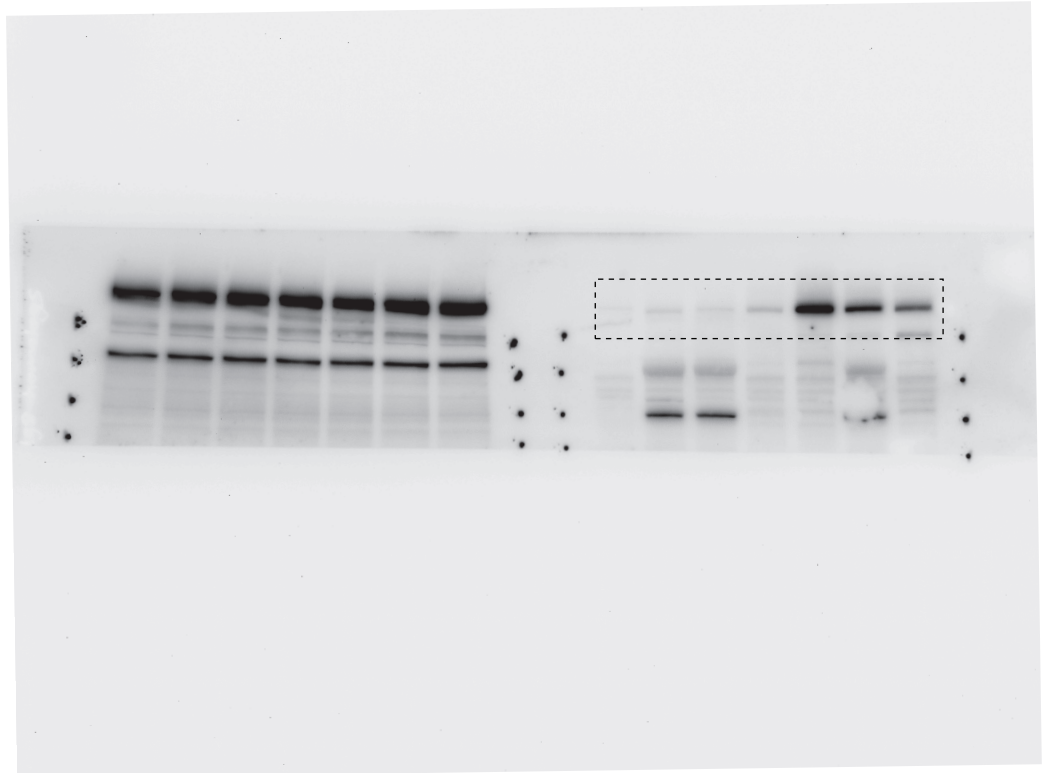

Figure 1A

GFP (total)  
Lower left panel

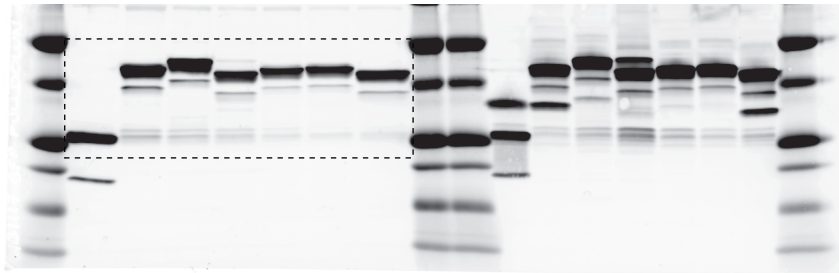

Figure 1A

GFP (total)  
Lower left panel

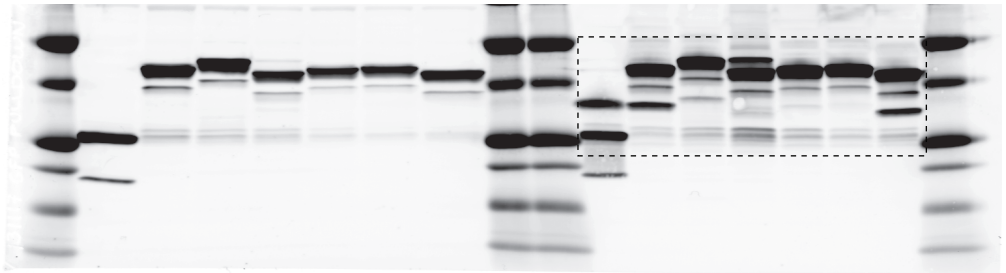

Supplement: embr0015-0557-sd11.pdf [file embr0015-0557-sd11.pdf]
